# Supplementary material
Source: Springer Nature journal article supplement (https://www.springermedizin.de/resource/supplementary/13054_2012_619_MOESM3_ESM.pdf/9708790)

**a)**

ONSD for detection of ICP>20mmHg  
Definition 1- SAIF present

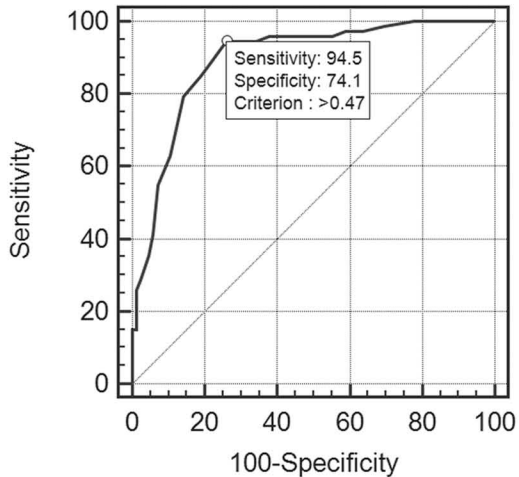**b)**

ONSD for the detection of ICP>20mmHg  
Definition 1- SAIF absent

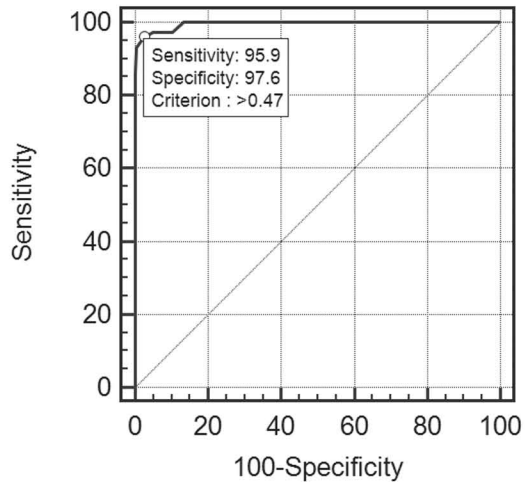

Supplement: MOESM3 [file 9708790]
